# Supplementary material
Source: publisher site journal article supplement (https://www.dovepress.com/article/278258)
Supplement: Supplementary file 1 [file get_supplementary_file.php]

**Supplementary Table 1. Articles identified in the literature review**

| **Authors** | **Title** | **Year** | **Journal** | **Signs and symptoms of AADC deficiency** |
| --- | --- | --- | --- | --- |
| Pearson TS, Gilbert L, Opladen T., et al. | AADC deficiency from infancy to adulthood: Symptoms and developmental outcome in an international cohort of 63 patients | 2020 | J Inherit Metab Dis (online ahead of print) | Hypotonia Developmental delay Oculogyric crises Sleep disturbance Irritable mood Feeding difficulties |
| Dai W, Lu D, Gu X., et al. | Aromatic L-amino acid decarboxylase deficiency in 17 Mainland China patients: Clinical phenotype, molecular spectrum, and therapy overview | 2020 | Mol Genet Genomic Med.; 8(3): e1143 | Oculogyric crises Delayed movement development Autonomic symptoms |
| Wang Y, Ke Z, Zou H., et al.* | Clinical and genetic analysis of two pedigrees affected with aromatic L-amino acid decarboxylase deficiency | 2019 | Zhonghua Yi Xue Yi Chuan Xue Za Zhi.; 26(11): 1085-1089 | Hypotension Developmental delay Oculogyric crises |
| Jung-Klawitter S, Kuseyri Huebschmann O. | Analysis of Catecholamines and Pterins in Inborn Errors of Monoamine Neurotransmitter Metabolism-From Past to Future | 2019 | Cells; 8(8): 867 | Autonomic dysregulation Hypotonia Movement disorders Develomental delay |
| Himmelreich N, Montoli R, Bertoldi M., et al. | Aromatic amino acid decarboxylase deficiency: Molecular and metabolic basis and therapeutic outlook | 2019 | Mol Genet Metab.; 127(1): 12-22 | Hypotonia Movement disorders Oculogyric crises Dystonia Autonomic dysfunction Behavioural disorders |
| Kojima K, Nakajima T, Taga N., et al. | Gene therapy improves motor and mental function of aromatic l-amino acid decarboxylase deficiency | 2019 | Brain; 142(2): 322-333 | No voluntary speech or movement |
| Chien YH, Lee NC, Tseng SH., et al. | Efficacy and safety of AAV2 gene therapy in children with aromatic L-amino acid decarboxylase deficiency: an open-label, phase 1/2 trial | 2017 | Lancet Child Adolesc Health; 1(4): 265-273 | Hypotonia Dystonia Oculogyric crisis |
| Hwu WL, Chien YH, Lee NC., et al. | Natural History of Aromatic L-Amino Acid Decarboxylase Deficiency in Taiwan | 2018 | JIMD Report; 40: 1-6 | Psychomotor delay Hypotonia Oculogyric crises Dystonia Extraneurological symptoms |
| Zhu J, Yu F.* | Feeding difficulty and developmental delay for 8 months and nystagmus for 4 months in an infant | 2017 | Zhongguo Dang Dai Er Ke Za Zhi;19(1):68-72. | Hypotonia Oculogyric crisis Autonomic dysfunction Developmental delay |
| Wassenberg T, Molero-Luis M, Jeltsch K., et al. | Consensus guideline for the diagnosis and treatment of aromatic l-amino acid decarboxylase (AADC) deficiency | 2017 | Orphanet J Rare Dis.;12(1):12. | Hypotonia Movement disorders (oculogyric crisis, dystonia, and hypokinesia) Developmental delay  Autonomic symptoms |
| Lee WT, Lin JH, Weng WC., et al. | Microstructural changes of brain in patients with aromatic L-amino acid decarboxylase deficiency | 2017 | Hum Brain Mapp.;38(3):1532-1540 | Global developmental delay Generalised hypotonia Dystonia Oculogyric crisis Excessive sweating Sleep problems |
| Kojima K, Anzai R, Ohba C., et al. | A female case of aromatic l-amino acid decarboxylase deficiency responsive to MAO-B inhibition | 2016 | Brain Dev.; 38(10): 359-963 | Floppiness No head control Limb dystonia Oculogyric crisis |
| Atwal PS, Donti TR, Cardon AL., et al. | Aromatic L-amino acid decarboxylase deficiency diagnosed by clinical metabolomic profiling of plasma | 2015 | Mol Genet Metab.;115(2-3):91-4. | Developmental delay Hypotonia |
| Leuzzi V, Mastrangelo M, Polizzi A., et al | Report of two never treated adult sisters with aromatic L-amino Acid decarboxylase deficiency: a portrait of the natural history of the disease or an expanding phenotype? | 2015 | JIMD Rep.:39-45 | Myasthenia-like manifestations Myoclonic jerk Oculogyric crisis Tremors Developmental delay |
| Alfadhel M, Kattan R. | Aromatic amino Acid decarboxylase deficiency not responding to pyridoxine and bromocriptine therapy: case report and review of response to treatment | 2014 | J Cent Nerv Syst Dis.;6:1-5 | Hypotonia Oculogyric crisis Sweating Hypersalivation Autonomic dysfunction Progressive encephalopathy Developmental delay |
| Hwu WL, Muramatsu S, Tseng SH., et al. | Gene therapy for aromatic L-amino acid decarboxylase deficiency | 2012 | Sci Transl Med.;4(134):134ra61. | Compromised development Delay in motor function development |
| Brun L, Ngu LH, Keng WT., et al. | Clinical and biochemical features of aromatic L-amino acid decarboxylase deficiency | 2010 | Neurology.;75(1):64-71 | Hypotonia Oculogyric crisis Developmental retardation |
| Ito S, Nakayama T, Ide S., et al. | Aromatic L-amino acid decarboxylase deficiency associated with epilepsy mimicking non-epileptic involuntary movements | 2008 | Dev Med Child Neurol.;50(11):876-8 | Global developmental delay Involuntary movements Autonomic dysfunction |
| Lee HF, Tsai CR, Chi CS., et al. | Aromatic L-amino acid decarboxylase deficiency in Taiwan | 2009 | Eur J Paediatr Neurol.;13(2):135-40 | Prominent startle response Tongue thrusting Ptosis Paroxysmal diaphoresis Nasal congestion Diarrhoea Irritability Sleep disorders |
| Tay SK, Poh KS, Hyland K., et al. | Unusually mild phenotype of AADC deficiency in 2 siblings | 2007 | Mol Genet Metab.;91(4):374-8 | Severe developmental delay Oculogyric crisis Extrapyramidal movements |
| Braeutigam C, Hyland K, Wevers R., et al. | Clinical and laboratory findings in twins with neonatal epileptic encephalopathy mimicking aromatic L-amino acid decarboxylase deficiency | 2002 | Neuropediatrics.;33(3):113-7 | Severe seizures Myoclonus Rotary eye movements Clonic contractions |
| Korenke GC, Christen HJ, Hyland K., et al. | Aromatic L-amino acid decarboxylase deficiency: an extrapyramidal movement disorder with oculogyric crises | 1997 | Eur J Paediatr Neurol.;1(2-3):67-71 | Extrapyramidal movement disorder Oculogyric crisis Vegetative symptoms |

*English abstract only
